# Supplementary material for: Hexanuclear tin(ii) and mixed valence tin(ii,iv) oxide clusters within polyoxometalates
Source: Royal Society of Chemistry journal article supplement (doi:10.1039/c6cc05284c), 2016-01-01
Supplement: c6cc05284c1.pdf [file c6cc05284c1.pdf]

*Electric supplementary information for*

## **Hexanuclear tin(II) and mixed valence tin(II,IV) oxide clusters within polyoxometalates**

Kosuke Suzuki, Takumi Hanaya, Rinta Sato, Takuo Minato, Kazuya Yamaguchi and Noritaka Mizuno\*

*Department of Applied Chemistry, School of Engineering, The University of Tokyo, 7-3-1 Hongo, Bunkyo-ku, Tokyo 113-8656, Japan*

**General:** Cold-spray ionization mass spectra were recorded on JEOL JMS-T100CS. UV-Vis absorption spectra were measured on Jasco V-570 with a quartz cell of 1 cm path length. UV-Vis diffuse reflectance spectra were measured on Jasco V-570DS. Thermogravimetric and differential thermal analyses (TG-DTA) were performed on Rigaku Thermo plus TG 8120. IR spectra were measured on Jasco FT/IR-4100 spectrometer using KBr disks. Inductively coupled plasma atomic emission spectroscopy (ICP-AES) analyses were performed on Shimadzu ICPS-8100. Elemental analyses for C, H, and N were performed on Yanaco MT-6 and Elementar vario MICRO cube at the Elemental Analysis Center of School of Science, the University of Tokyo. GC mass spectra were recorded on Shimadzu GCMS-QP2010 at an ionization voltage of 70 eV.

**Reagents:** Sn(OAc)<sub>2</sub> and Sn(OAc)<sub>4</sub> (OAc = acetate) were obtained from Wako and used as received. TBAOH (37wt% methanol solution) and nitromethane were obtained from TCI and used as received. Acetonitrile, acetonitrile-*d*<sub>3</sub> (CD<sub>3</sub>CN), 1,2-dichloroethane, and diethyl ether were obtained from Kanto. TBA<sub>4</sub>H<sub>6</sub>[A- $\alpha$ -SiW<sub>9</sub>O<sub>34</sub>] $\cdot$ 2H<sub>2</sub>O (**SiW9**, TBA = tetra-*n*-butylammonium) was synthesized according to the reported procedure.<sup>S1</sup>

**Synthesis of TBA<sub>7</sub>H[Sn<sup>2+</sup><sub>6</sub>(A- $\alpha$ -SiW<sub>9</sub>O<sub>34</sub>)<sub>2</sub>] $\cdot$ 2H<sub>2</sub>O (I):** Sn(OAc)<sub>2</sub> (0.22 g, 0.93 mmol) was immersed in 1,2-dichloroethane (20 mL), followed by addition of **SiW9** (1.0 g, 0.31 mmol). After

the solution was stirred for 1 day, the solution was poured into diethyl ether (200 mL). The dark orange precipitate formed was filtered off, and dried to afford crude sample of **I**. The crude sample of **I** was recrystallized from a mixed solvent of 1,2-dichloroethane/diethyl ether to afford dark orange crystals of **I** (0.16 g, 15% yield based on **SiW9**). FT-IR (KBr pellet): 2961, 2928, 2874, 2838, 1635, 1483, 1463, 1378, 996, 952, 899, 793, 737, 546, 458, 378, 360, 302, 287, 281, 273, 256, 251  $\text{cm}^{-1}$ ; UV-Vis ( $\text{CH}_3\text{CN}$ ):  $\lambda$  ( $\epsilon$ ) 251 nm ( $7.90 \times 10^4 \text{ M}^{-1} \text{ cm}^{-1}$ ), 418 nm ( $1.65 \times 10^3 \text{ M}^{-1} \text{ cm}^{-1}$ );  $^{29}\text{Si}$  NMR ( $\text{CD}_3\text{CN}$ , TMS):  $\delta = -85.5$  ppm;  $^{29}\text{Si}$  NMR ( $\text{CD}_3\text{CN}$ , with 1 eq. of TBAOH 37 wt% in methanol, TMS):  $\delta = -86.3$  ppm;  $^{119}\text{Sn}$  NMR ( $\text{CD}_3\text{CN}$ ,  $\text{SnCl}_4$ ):  $\delta = -335.8, -348.5, -350.9, -536.7, -543.3, -548.7$  ppm;  $^{119}\text{Sn}$  NMR ( $\text{CD}_3\text{CN}$ , with 1 eq. of TBAOH 37 wt% in methanol,  $\text{SnCl}_4$ ):  $\delta = -318.4, -528.6$  ppm with respective integrated intensity ratio of 1:1;  $^{183}\text{W}$  NMR ( $\text{CD}_3\text{CN}$ , with 1 eq. of TBAOH 37 wt% in methanol,  $\text{Na}_2\text{WO}_4$ ):  $\delta = -49.1, -78.8, -83.3, -118.2, -120.7, -134.7$  ppm with respective integrated intensity ratio of 1:1:1:1:1:1; positive ion MS (ESI, acetonitrile):  $m/z$  7106 (calcd. 7106)  $[\text{TBA}_8\text{HSn}_6(\text{SiW}_9\text{O}_{34})_2]^+$ , 3674 (calcd. 3674)  $[\text{TBA}_9\text{HSn}_6(\text{SiW}_9\text{O}_{34})_2]^{2+}$ ; elemental analysis calcd. (%) for  $\text{TBA}_7\text{H}[\text{Sn}_6(\text{SiW}_9\text{O}_{34})_2] \cdot 2\text{H}_2\text{O}$  ( $\text{C}_{112}\text{H}_{257}\text{N}_7\text{O}_{70}\text{Si}_2\text{Sn}_6\text{W}_{18}$ ): C 19.50, H 3.75, N 1.42, Si 0.81, Sn 10.32, W 47.96; found, C 19.49, H 3.70, N 1.45, Si 0.82, Sn 10.42, W 49.25.

**Synthesis of  $\text{TBA}_7\text{H}[\text{Sn}^{2+}_3\text{Sn}^{4+}_3(\mu_3\text{-O})_3(\text{A-}\alpha\text{-SiW}_9\text{O}_{34})_2] \cdot 3\text{H}_2\text{O}$  (**II**):** Compound **I** was dissolved in nitromethane/1,2-dichloroethane (12 mL/3 mL). Then, diethyl ether was added to the solution, followed by filtration with PTFE filter. After the solution was kept at 303 K for 2 days, the yellow crystals formed were filtered off to afford **II** (0.69 g, 65% yield based on **I**). Single crystals suitable for X-ray analysis were obtained by recrystallization from nitromethane/toluene. FT-IR (KBr pellet): 2961, 2925, 2875, 2838, 1635, 1484, 1461, 1402, 1377, 1165, 1109, 1059, 1016, 998, 954, 902, 822, 771, 734, 687, 533, 378, 360, 343, 328, 320, 303, 290, 282, 272, 256  $\text{cm}^{-1}$ ; UV-vis ( $\text{CH}_3\text{CN}$ ):  $\lambda$  ( $\epsilon$ ) 246 nm ( $6.39 \times 10^4 \text{ M}^{-1} \text{ cm}^{-1}$ ), 317 nm ( $1.77 \times 10^4 \text{ M}^{-1} \text{ cm}^{-1}$ );  $^{29}\text{Si}$  NMR ( $\text{CD}_3\text{CN}$ , with 1 eq. of TBAOH 37 wt% in methanol, TMS):  $\delta = -83.3$  ppm ( $\Delta_{1/2} = 17.5$  Hz);  $^{119}\text{Sn}$  NMR

(CD<sub>3</sub>CN, SnCl<sub>4</sub>):  $\delta = -498.7, -544.4, -605.2, -631.6$  ppm with respective integrated intensity ratio of 1:2:1:2; <sup>119</sup>Sn NMR (CD<sub>3</sub>CN, with 1 eq. of TBAOH 37 wt% in methanol, SnCl<sub>4</sub>):  $\delta = -500.0, -633.8$  ppm with respective integrated intensity ratio of 1:1; <sup>183</sup>W NMR (CD<sub>3</sub>CN, with 1 eq. of TBAOH 37 wt% in methanol, Na<sub>2</sub>WO<sub>4</sub>):  $\delta = -119.6, -145.0$  ppm with respective integrated intensity ratio of 2:1; positive ion MS (CSI, acetonitrile):  $m/z$  7154 (calcd. 7154) [TBA<sub>8</sub>HSn<sub>6</sub>O<sub>3</sub>(SiW<sub>9</sub>O<sub>34</sub>)<sub>2</sub>]<sup>+</sup>, 3698 (calcd. 3698) [TBA<sub>9</sub>HSn<sub>6</sub>O<sub>3</sub>(SiW<sub>9</sub>O<sub>34</sub>)<sub>2</sub>]<sup>2+</sup>; elemental analysis calcd. (%) for TBA<sub>7</sub>H[Sn<sub>6</sub>O<sub>3</sub>(SiW<sub>9</sub>O<sub>34</sub>)<sub>2</sub>] $\cdot$ 3H<sub>2</sub>O (C<sub>112</sub>H<sub>259</sub>N<sub>7</sub>O<sub>74</sub>Si<sub>2</sub>Sn<sub>6</sub>W<sub>18</sub>): C 19.31, H 3.75, N 1.41, Si 0.81, Sn 10.23, W 47.50; found, C 19.45, H 3.70, N 1.51, Si 0.81, Sn 10.33, W 48.13.

**X-ray crystallography:** Diffraction measurements were made on a Rigaku MicroMax-007 Saturn 724 CCD detector with graphite monochromated Mo K $\alpha$  radiation ( $\lambda = 0.71069$  Å) at  $-153$  K. Data were collected and processed using CrystalClear<sup>S2</sup> and HKL2000.<sup>S3</sup> Neutral scattering factors were obtained from the standard source. In the reduction of data, Lorentz and polarization corrections were made. The structural analysis was performed using CrystalStructure<sup>S4</sup> and Win-GX.<sup>S5</sup> All structures were solved by SHELXS and refined by full-matrix least-squares methods using SHELXL.<sup>S6</sup> The highly disordered solvent molecules of crystallization were omitted by use of SQUEEZE program.<sup>S7</sup> CCDC-1486719 (**I**) and CCDC-1486720 (**II**) contain the supplementary crystallographic data for this paper. The data can be obtained free of charge via [www.ccdc.cam.ac.uk/conts/retrieving.html](http://www.ccdc.cam.ac.uk/conts/retrieving.html) (or from the Cambridge Crystallographic Data Centre, 12, Union Road, Cambridge CB2 1EZ, UK; Fax: (+44) 1223-336-033; or [deposit@ccdc.cam.ac.uk](mailto:deposit@ccdc.cam.ac.uk)).

**Bond valence sum (BVS) calculations:** The BVS values were calculated by the expression for the variation of the length  $r_{ij}$  of a bond between two atoms  $i$  and  $j$  in observed crystal with valence  $V_i$ :

$$V_i = \sum_j \exp\left(\frac{r'_0 - r_{ij}}{B}\right)$$

where  $B$  is constant equal to  $0.37$  Å,  $r'_0$  is bond valence parameter for a given atom pair.<sup>S8</sup>

**DFT calculations:** The calculations were performed with Gaussian 09 software.<sup>S9</sup> The anionic parts of **I**, **II**, and **SiW9** were optimized at the B3LYP level theory<sup>S10</sup> with 6-31++G\* (for O, H) and 6-31G\* (for Si), and LanL2DZ (for Sn, W)<sup>S11</sup> by using the polarizable continuum model (PCM) using the integral equation formalism variant (IEFPCM)<sup>S12</sup> with the parameters of the United Atom Topological Model (UAHF) for acetonitrile.

**Electrochemistry:** Cyclic voltammetric measurements were carried out with a Solartron SI 1287 Electrochemical Interface. A standard three-electrode arrangement was employed with a BAS glassy carbon disk electrode as the working electrode, a platinum wire as the counter electrode, and a silver wire electrode as the pseudoreference electrode. The voltage scan rate was set at 200 mV s<sup>-1</sup>, and TBAClO<sub>4</sub> was used as an electrolyte. The potentials were measured using Ag/AgNO<sub>3</sub> reference electrode (10 mM AgNO<sub>3</sub>, 100 mM TBAClO<sub>4</sub> in acetonitrile, 0.55 V vs NHE)

#### Additional references

- S1 T. Minato, K. Suzuki, K. Kamata and N. Mizuno, *Chem. –Eur. J.*, 2014, **20**, 5946.
- S2 (a) *CrystalClear* 1.3.6, Rigaku and Rigaku/MSK, The Woodlands, TX; (b) J. W. Pflugrath, *Acta Crystallogr.*, 1999, **D55**, 1718.
- S3 Z. Otwinowski and W. Minor, Processing of X-ray Diffraction Data Collected in Oscillation Mode. in *Methods in Enzymology*, C. W. Carter, Jr. and R. M. Sweet, Eds., Macromolecular Crystallography, Part A, Academic press, New York, 1997, vol. 276, pp. 307–326.
- S4 *CrystalStructure* 3.8, Rigaku and Rigaku/MSK, The Woodlands, TX.
- S5 L. J. Farrugia, *J. Appl. Crystallogr.*, 1999, **32**, 837.
- S6 (a) G. M. Sheldrick, SHELX97, *Programs for Crystal Structure Analysis*, Release 97-2, University of Göttingen, Göttingen, Germany, 1997; (b) G. M. Sheldrick, SHELX-2014,

*Programs for Crystal Structure Analysis*, University of Göttingen, Göttingen, Germany, 2014.

- S7 P. van der Sluis and A. L. Spek, *Acta Crystallogr.*, 1990, **A46**, 194.
- S8 (a) I. D. Brown and D. Altermatt, *Acta Crystallogr.*, 1985, **B41**, 244; (b) A. Trzesowska, R. Kruszynski and T. J. Bartczak, *Acta Crystallogr.*, 2004, **B60**, 174; (c) A. Trzesowska, R. Kruszynski and T. J. Bartczak, *Acta Crystallogr.* 2005, **B61**, 429.
- S9 M. J. Frisch, G. W. Trucks, H. B. Schlegel, G. E. Scuseria, M. A. Robb, J. R. Cheeseman, G. Scalmani, V. Barone, B. Mennucci, G. A. Petersson, H. Nakatsuji, M. Caricato, X. Li, H. P. Hratchian, A. F. Izmaylov, J. Bloino, G. Zheng, J. L. Sonnenberg, M. Hada, M. Ehara, K. Toyota, R. Fukuda, J. Hasegawa, M. Ishida, T. Nakajima, Y. Honda, O. Kitao, H. Nakai, T. Vreven, J. A. Montgomery, Jr., J. E. Peralta, F. Ogliaro, M. Bearpark, J. J. Heyd, E. Brothers, K. N. Kudin, V. N. Staroverov, R. Kobayashi, J. Normand, K. Raghavachari, A. Rendell, J. C. Burant, S. S. Iyengar, J. Tomasi, M. Cossi, N. Rega, J. M. Millam, M. Klene, J. E. Knox, J. B. Cross, V. Bakken, C. Adamo, J. Jaramillo, R. Gomperts, R. E. Stratmann, O. Yazyev, A. J. Austin, R. Cammi, C. Pomelli, J. W. Ochterski, R. L. Martin, K. Morokuma, V. G. Zakrzewski, G. A. Voth, P. Salvador, J. J. Dannenberg, S. Dapprich, A. D. Daniels, Ö. Farkas, J. B. Foresman, J. V. Ortiz, J. Cioslowski and D. J. Fox, *Gaussian 09*, Revision C.01; Gaussian, Inc.: Wallingford, CT, 2009.
- S10 A. D. Becke, *J. Chem. Phys.*, 1993, **98**, 1372.
- S11 P. J. Hay and W. R. Wadt, *J. Chem. Phys.*, 1985, **82**, 270.
- S12 J. Tomasi, M. Mennucci and E. J. Cancès, *Mol. Struct.*, 1994, **464**, 211.

**Table S1.** Crystallographic data for **I** and **II**

|                                                             | <b>I</b>                                                                                                         | <b>II</b>                                                                                        |
|-------------------------------------------------------------|------------------------------------------------------------------------------------------------------------------|--------------------------------------------------------------------------------------------------|
| formula                                                     | C <sub>124</sub> Cl <sub>12</sub> N <sub>7</sub> O <sub>73</sub> Si <sub>2</sub> Sn <sub>6</sub> W <sub>18</sub> | C <sub>115</sub> N <sub>10</sub> O <sub>77</sub> Si <sub>2</sub> Sn <sub>6</sub> W <sub>18</sub> |
| Fw (g mol <sup>-1</sup> )                                   | 7258.33                                                                                                          | 6830.87                                                                                          |
| crystal system                                              | monoclinic                                                                                                       | triclinic                                                                                        |
| space group                                                 | <i>P</i> 2 <sub>1</sub> (No. 4)                                                                                  | <i>P</i> -1 (No. 2)                                                                              |
| <i>a</i> (Å)                                                | 18.75170(10)                                                                                                     | 17.6999(2)                                                                                       |
| <i>b</i> (Å)                                                | 28.4384(3)                                                                                                       | 18.7362(2)                                                                                       |
| <i>c</i> (Å)                                                | 21.5390(2)                                                                                                       | 29.8744(4)                                                                                       |
| $\alpha$ (deg)                                              | 90                                                                                                               | 82.6590(10)                                                                                      |
| $\beta$ (deg)                                               | 115.1216(3)                                                                                                      | 88.2780(10)                                                                                      |
| $\gamma$ (deg)                                              | 90                                                                                                               | 74.2910(10)                                                                                      |
| <i>V</i> (Å <sup>3</sup> )                                  | 10399.58(16)                                                                                                     | 9458.9(2)                                                                                        |
| <i>Z</i>                                                    | 2                                                                                                                | 2                                                                                                |
| temp (K)                                                    | 113(2)                                                                                                           | 113(2)                                                                                           |
| $\rho_{\text{calcd}}$ (g cm <sup>-3</sup> )                 | 2.318                                                                                                            | 2.398                                                                                            |
| GOF                                                         | 1.038                                                                                                            | 1.048                                                                                            |
| <i>R</i> <sub>1</sub> [ <i>I</i> > 2 $\sigma$ ( <i>I</i> )] | 0.0724<br>(for 24462 data)                                                                                       | 0.0767<br>(for 35730 data)                                                                       |
| <i>wR</i> <sub>2</sub>                                      | 0.2046<br>(for all 28615 data)                                                                                   | 0.2039<br>(for all 51684 data)                                                                   |

**Table S2.** Selected BVS values for **I** and **II**

| <b>I</b> |      | <b>II</b> |      |
|----------|------|-----------|------|
| Sn1      | 2.26 | Sn1       | 1.93 |
| Sn2      | 1.87 | Sn2       | 1.84 |
| Sn3      | 2.31 | Sn3       | 2.02 |
| Sn4A     | 1.86 | Sn4       | 3.91 |
| Sn5A     | 1.85 | Sn5       | 3.91 |
| Sn6A     | 1.86 | Sn6       | 3.94 |
| Sn4B     | 2.01 |           |      |
| Sn5B     | 2.01 |           |      |
| Sn6B     | 2.01 |           |      |

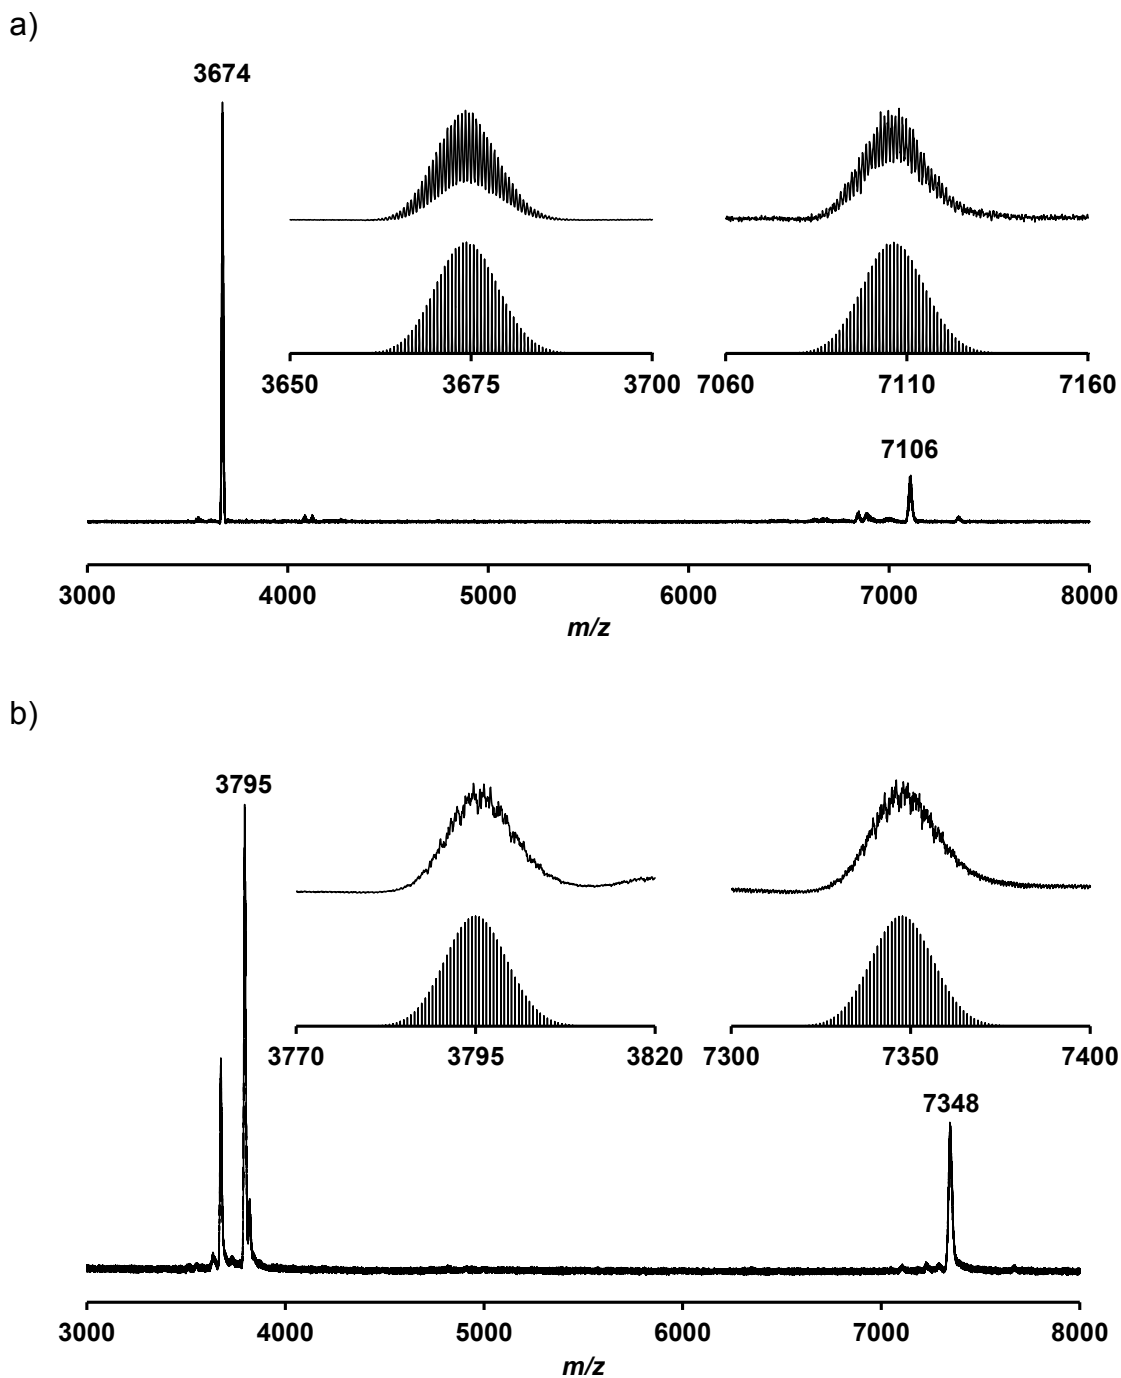

**Fig. S1** CSI-mass spectra of a) **I** and b) **I** + TBAOH (1 equiv) in acetonitrile. Insets: a) spectra in the range of  $m/z$  3650–3700 and 7060–7160, and the calculated patterns for  $[\text{TBA}_9\text{HSn}_6(\text{SiW}_9\text{O}_{34})_2]^{2+}$  ( $m/z$  3674) and  $[\text{TBA}_8\text{HSn}_6(\text{SiW}_9\text{O}_{34})_2]^+$  ( $m/z$  7106), b) spectra in the range of  $m/z$  3675–2725 and 7110–7210, and the calculated patterns for  $[\text{TBA}_{10}\text{Sn}_6(\text{SiW}_9\text{O}_{34})_2]^{2+}$  ( $m/z$  3795) and  $[\text{TBA}_9\text{Sn}_6(\text{SiW}_9\text{O}_{34})_2]^+$  ( $m/z$  7348).



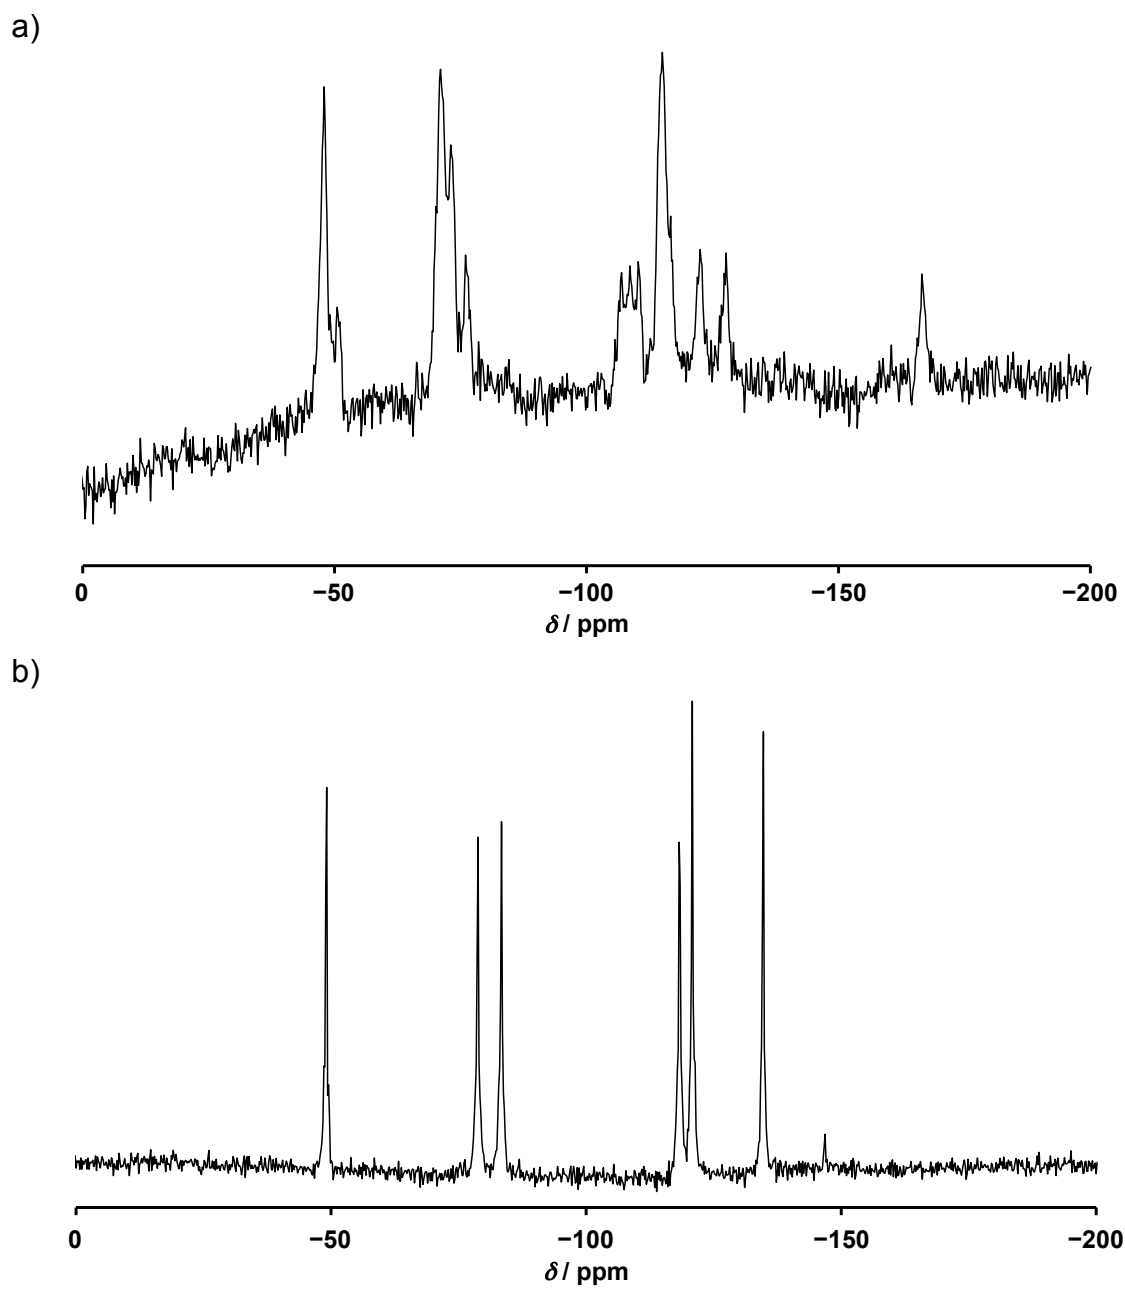

**Fig. S2.**  $^{183}\text{W}$  NMR spectra of a) **I** and b) **I** + TBAOH (1 equiv with respect to **I**) in acetonitrile- $d_3$ .

a)

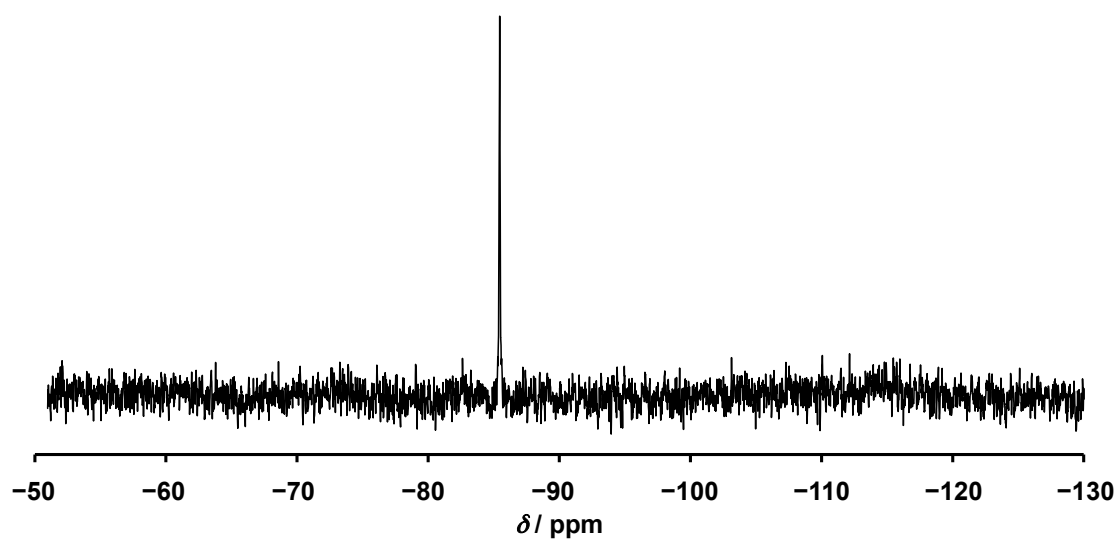

b)

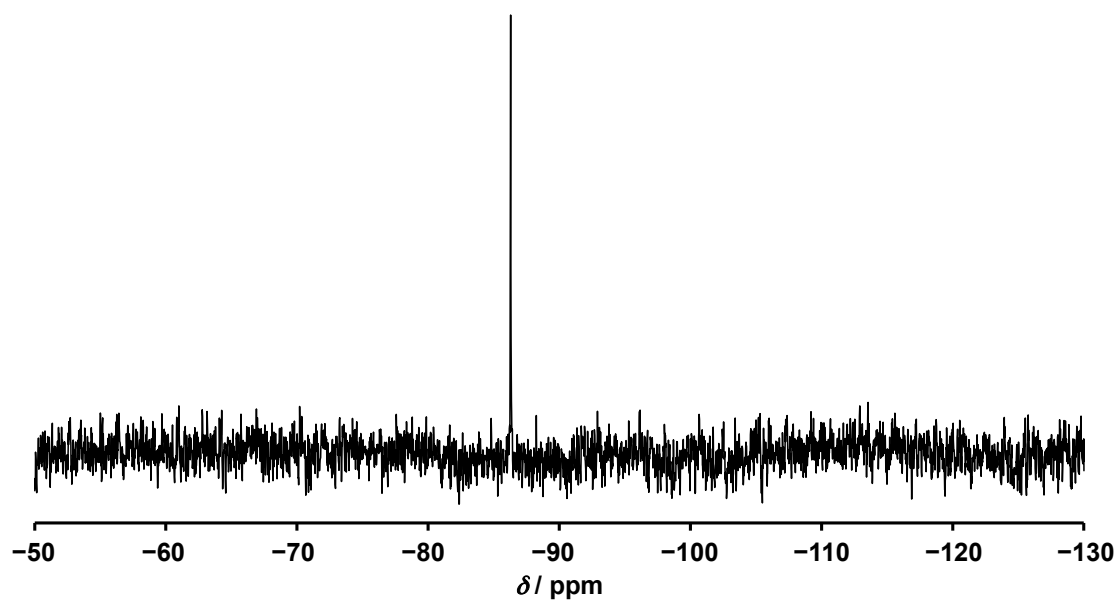

**Fig. S3**  $^{29}\text{Si}$  NMR spectra of a) **I** and b) **I** + TBAOH (1 equiv with respect to **I**) in acetonitrile- $d_3$ .

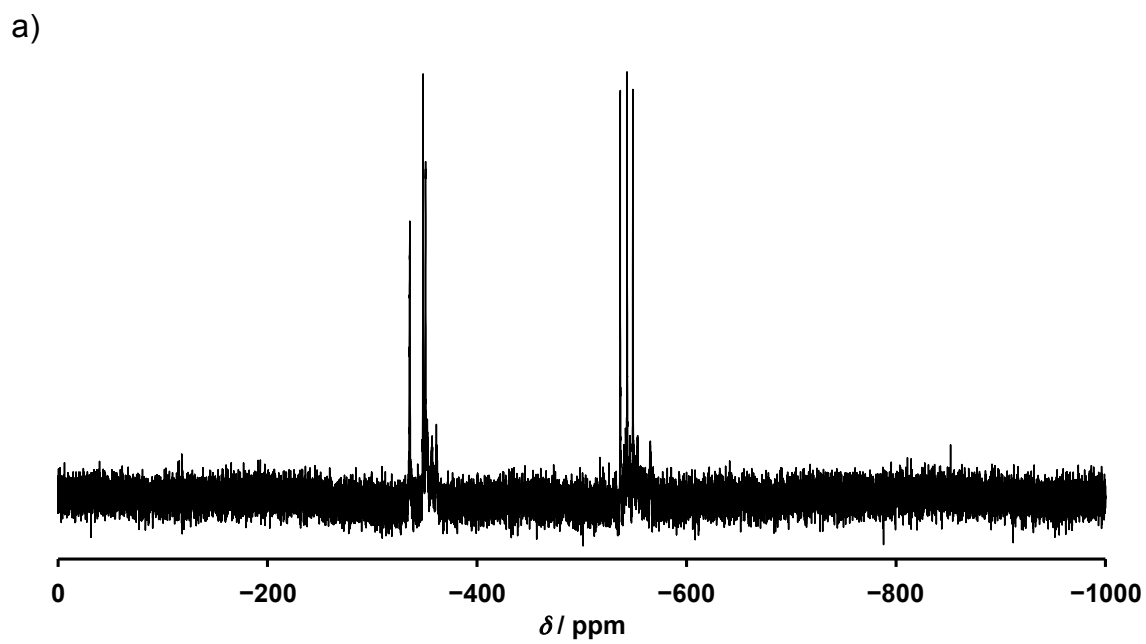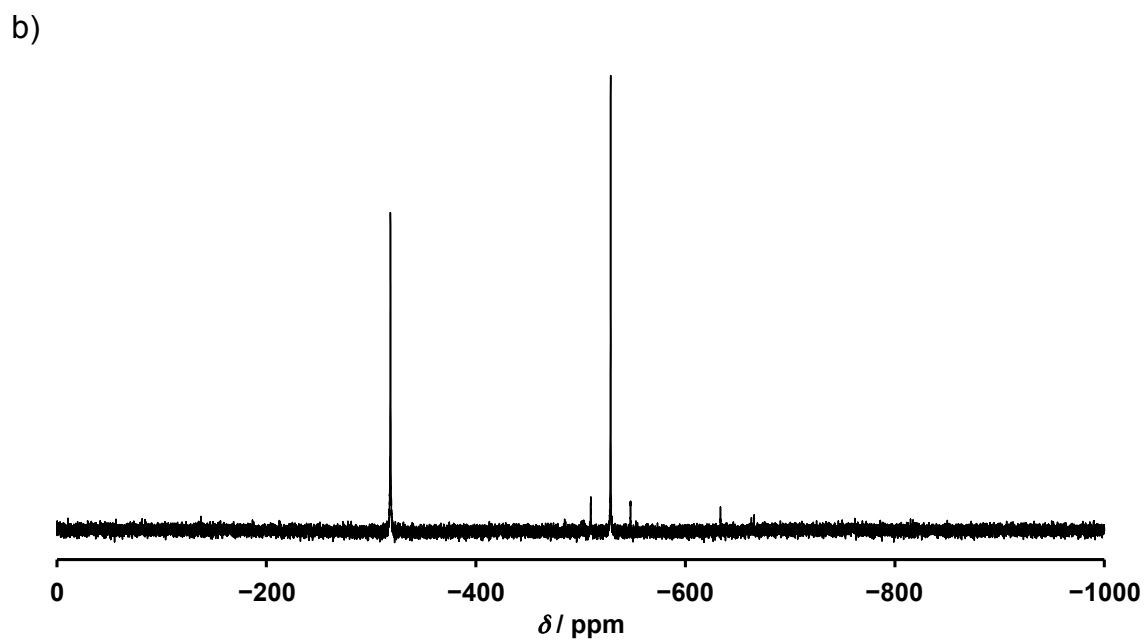

**Fig. S4**  $^{119}\text{Sn}$  NMR spectra of a) **I** and b) **I** + TBAOH (1 equiv with respect to **I**) in acetonitrile- $d_3$ .

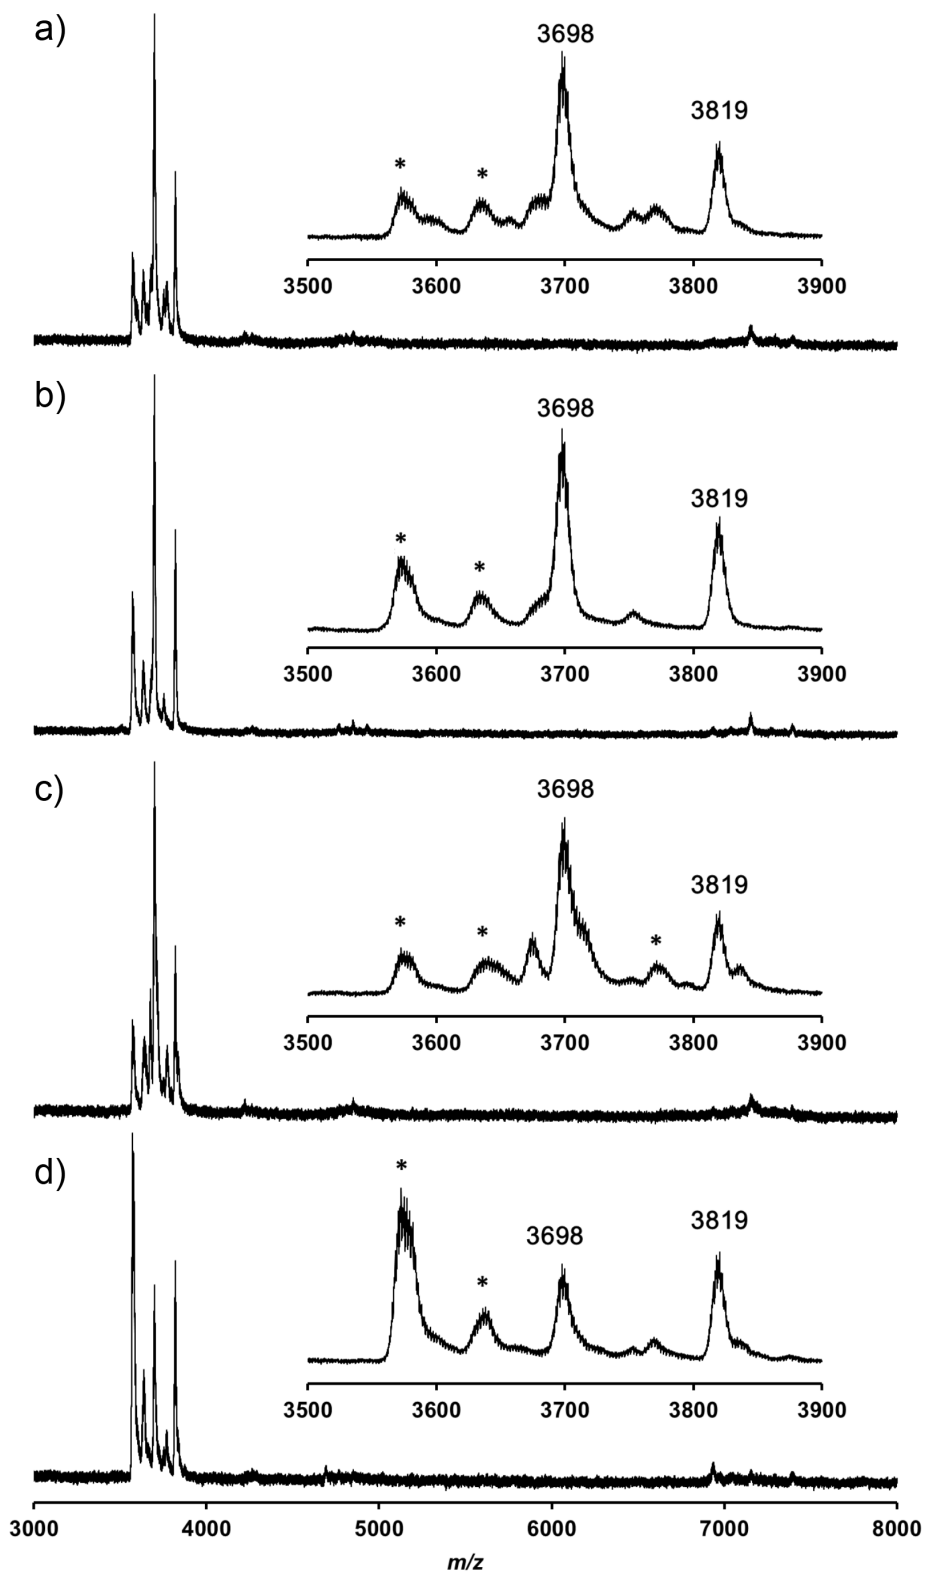

**Fig. S5** CSI-mass spectra of **I** after addition of  $\text{H}_2\text{O}_2$  (a, 5 min; b, 8 h) and *tert*-butyl hydroperoxide (c, 5 min; d, 8 h) (3 equivalents with respect to **I**) in acetonitrile. Signal sets centered at  $m/z$  3698 and 3819 are assignable to  $[\text{TBA}_9\text{HSn}_6\text{O}_3(\text{SiW}_9\text{O}_{34})_2]^{2+}$  and  $[\text{TBA}_{10}\text{Sn}_6\text{O}_3(\text{SiW}_9\text{O}_{34})_2]^{2+}$ , respectively. Signals indicated by asterisks could not be assigned.

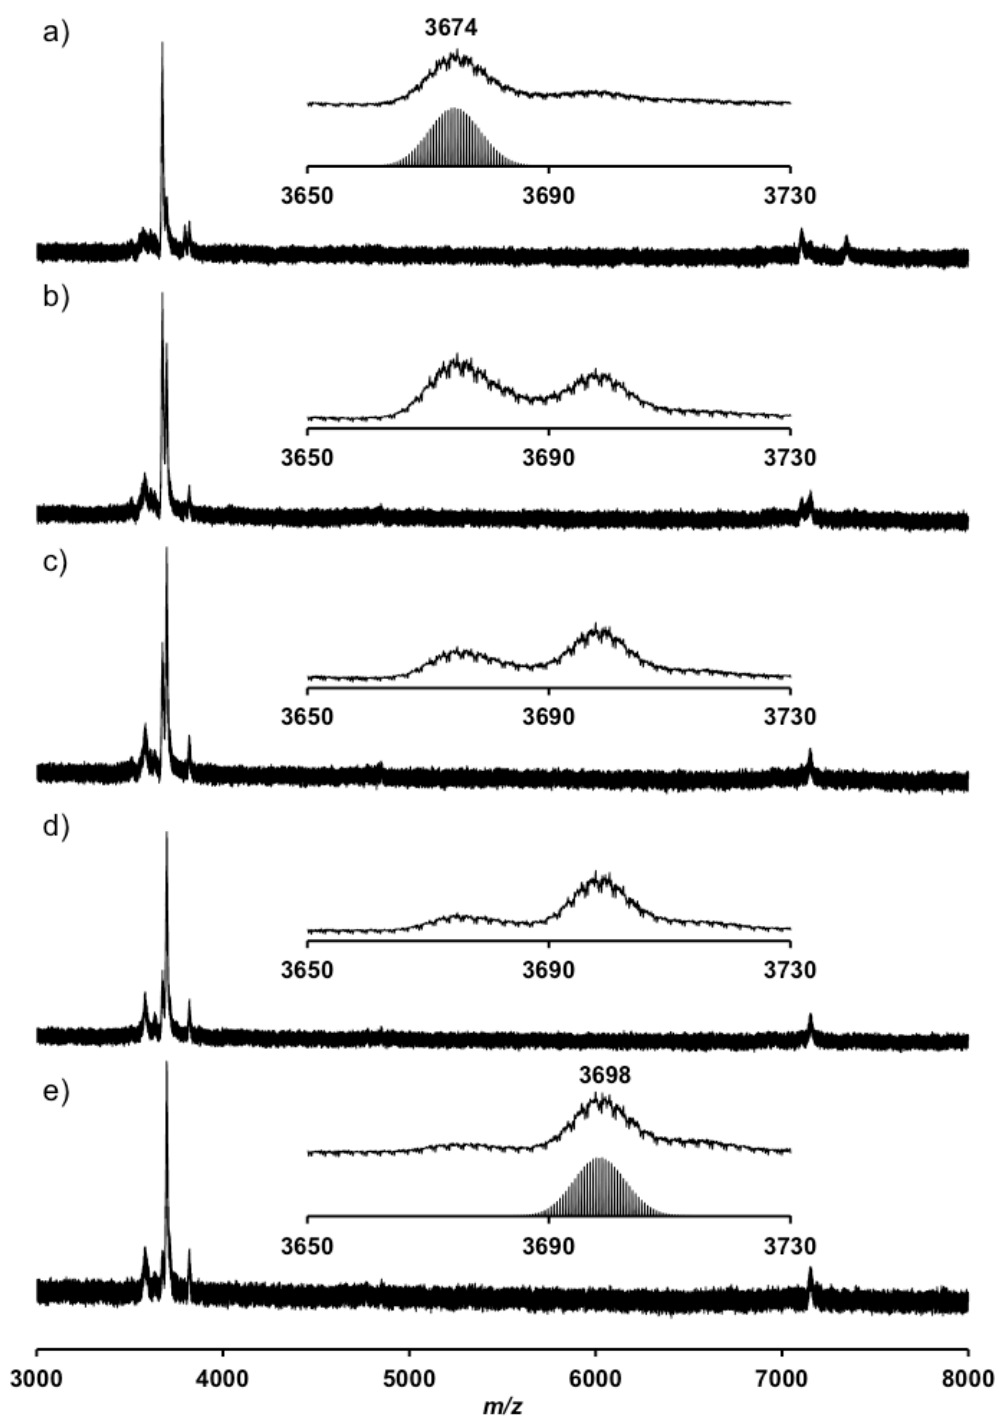

**Fig. S6** CSI-mass spectra of **I** treated in the mixed solvent of nitromethane/1,2-dichloroethane (4:1 v/v) for a) 0 h, b) 2 h, c) 4 h, d) 6 h, and e) 8 h. Insets: spectra in the range of  $m/z$  3650–3730 and the calculated patterns for  $[\text{TBA}_9\text{HSn}_6(\text{SiW}_9\text{O}_{34})_2]^{2+}$  ( $m/z$  3674) and  $[\text{TBA}_9\text{HSn}_6\text{O}_3(\text{SiW}_9\text{O}_{34})_2]^{2+}$  ( $m/z$  3698).

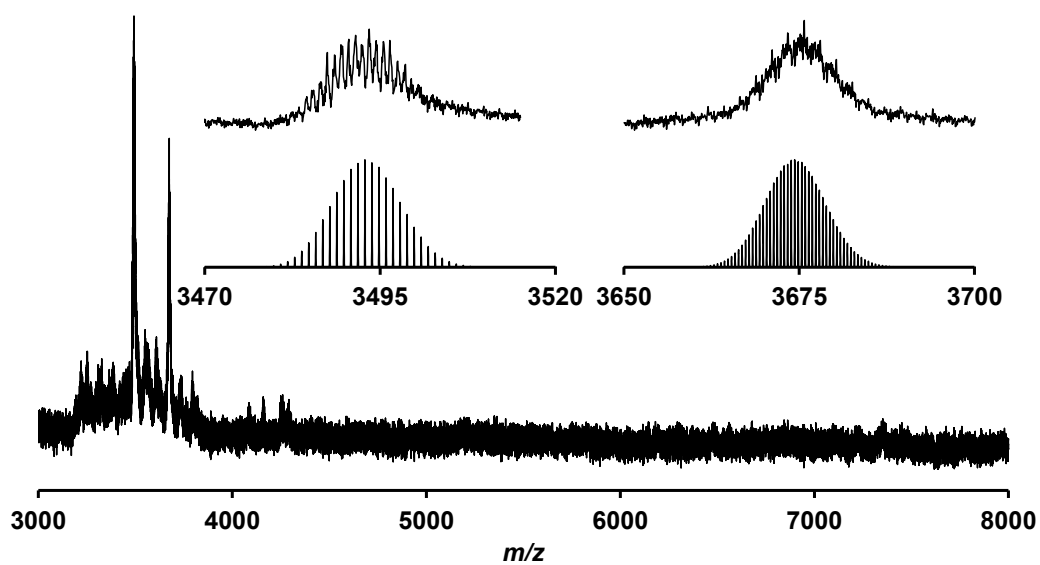

**Fig. S7** CSI-mass spectrum of the product by the reaction of **SiW9**, Sn(OAc)<sub>2</sub>, and Sn(OAc)<sub>4</sub> (2:3:3 molar ratio) in acetonitrile. Insets: spectra in the range of *m/z* 3470–3520 and 3650–3700, and the calculated patterns for [TBA<sub>5</sub>SiW<sub>9</sub>O<sub>30</sub>(CH<sub>3</sub>COO)<sub>2</sub>]<sup>+</sup> (*m/z* 3693) and [TBA<sub>9</sub>HSn<sub>6</sub>(SiW<sub>9</sub>O<sub>34</sub>)<sub>2</sub>]<sup>2+</sup> (*m/z* 3674).

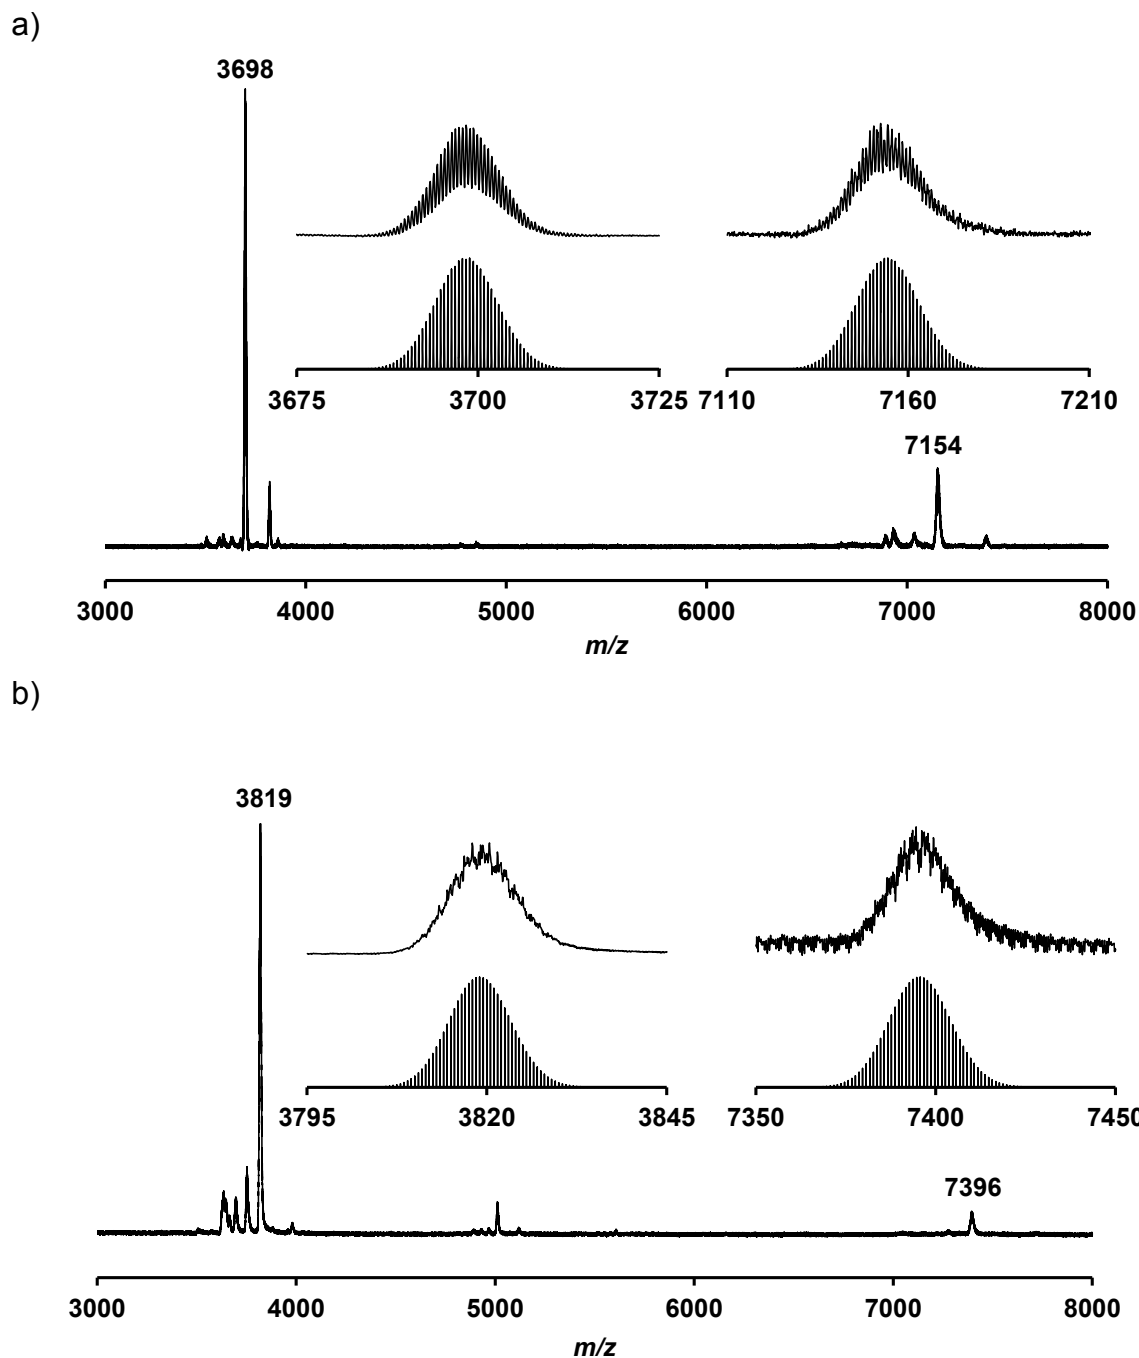

**Fig. S8** CSI-mass spectra of a) **II** and b) **II** + TBAOH (1 equiv) in acetonitrile. Insets: a) spectra in the range of *m/z* 3675–3725 and 7110–7210, and the calculated patterns for  $[\text{TBA}_9\text{HSn}_6\text{O}_3(\text{SiW}_9\text{O}_{34})_2]^{2+}$  (*m/z* 3698) and  $[\text{TBA}_8\text{HSn}_6\text{O}_3(\text{SiW}_9\text{O}_{34})_2]^+$  (*m/z* 7154), b) spectra in the range of *m/z* 3795–3845 and 7350–7450, and the calculated patterns for  $[\text{TBA}_{10}\text{Sn}_6\text{O}_3(\text{SiW}_9\text{O}_{34})_2]^{2+}$  (*m/z* 3819) and  $[\text{TBA}_9\text{Sn}_6\text{O}_3(\text{SiW}_9\text{O}_{34})_2]^+$  (*m/z* 7396).

a)

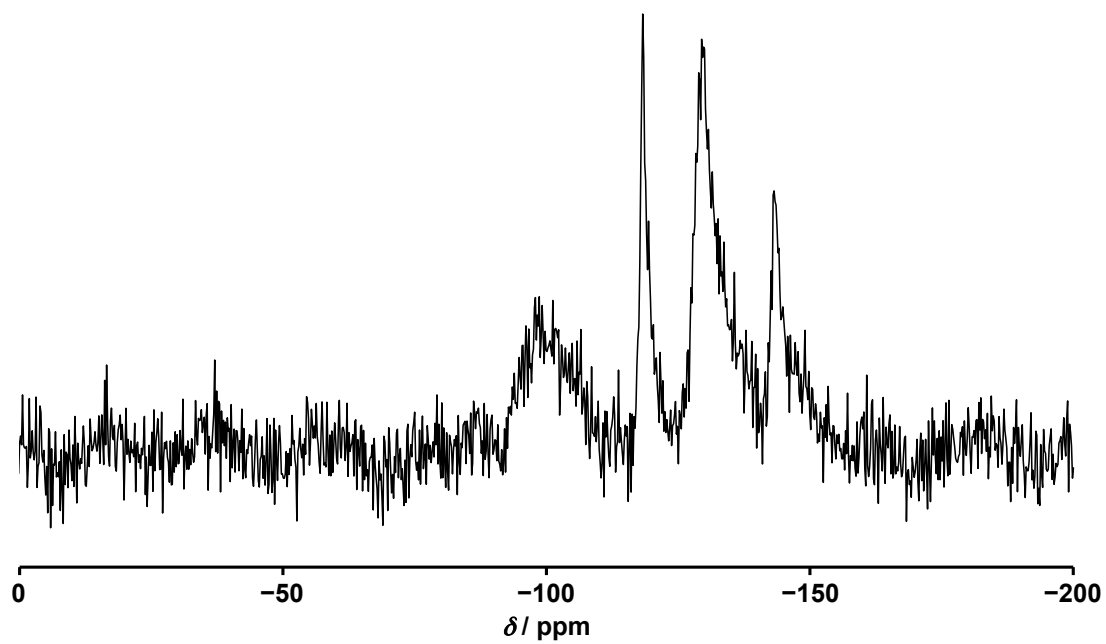

b)

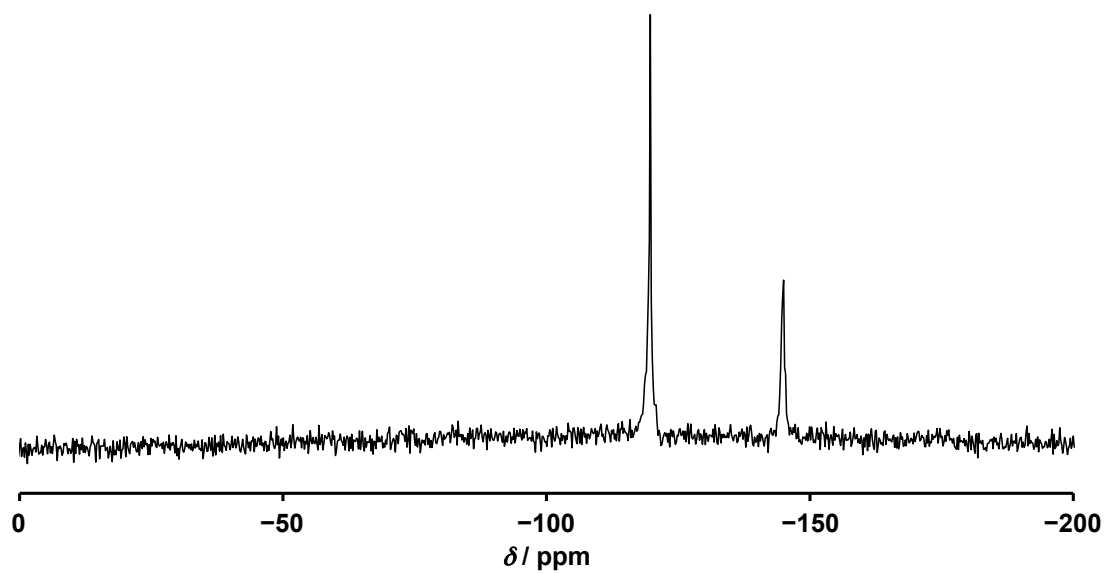

**Fig. S9**  $^{183}\text{W}$  NMR spectra of a) **II** and b) **II** + TBAOH (1 equiv with respect to **II**) in acetonitrile- $d_3$ .



a)

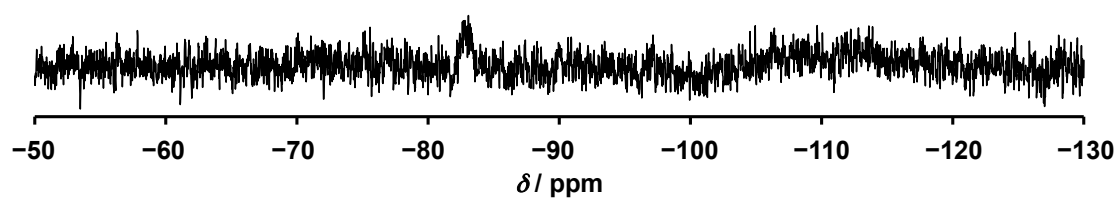

b)

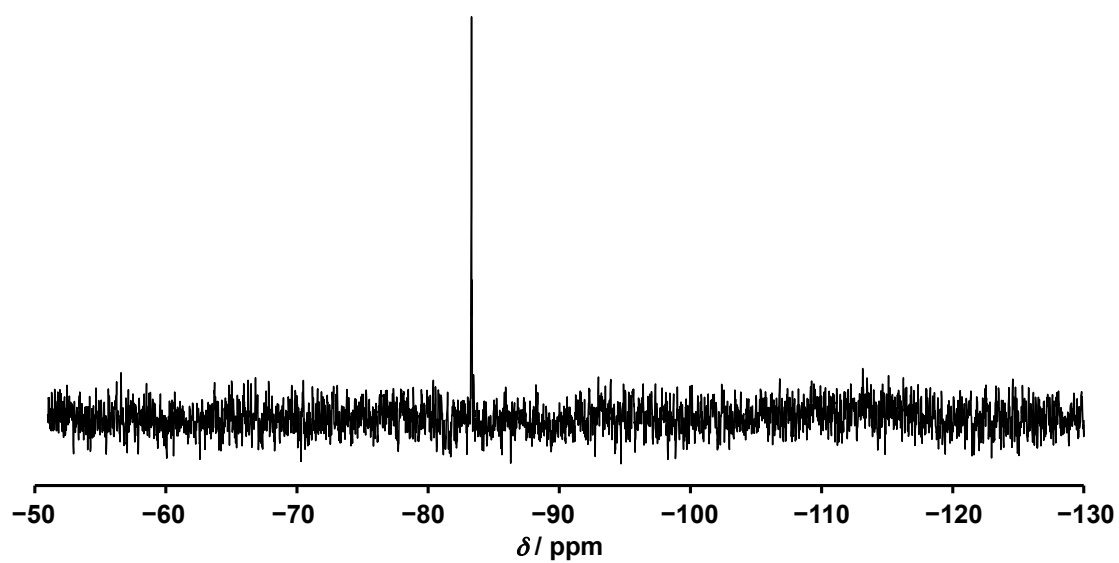

**Fig. S10**  $^{29}\text{Si}$  NMR spectra of a) **II** and b) **II** + TBAOH (1 equiv with respect to **II**) in acetonitrile- $d_3$ .

a)

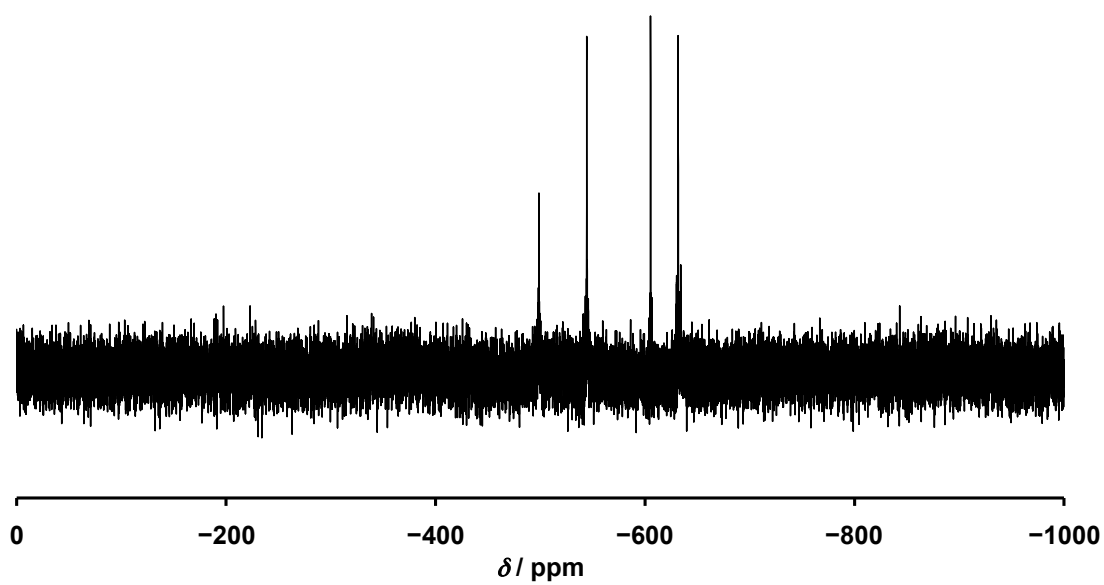

b)

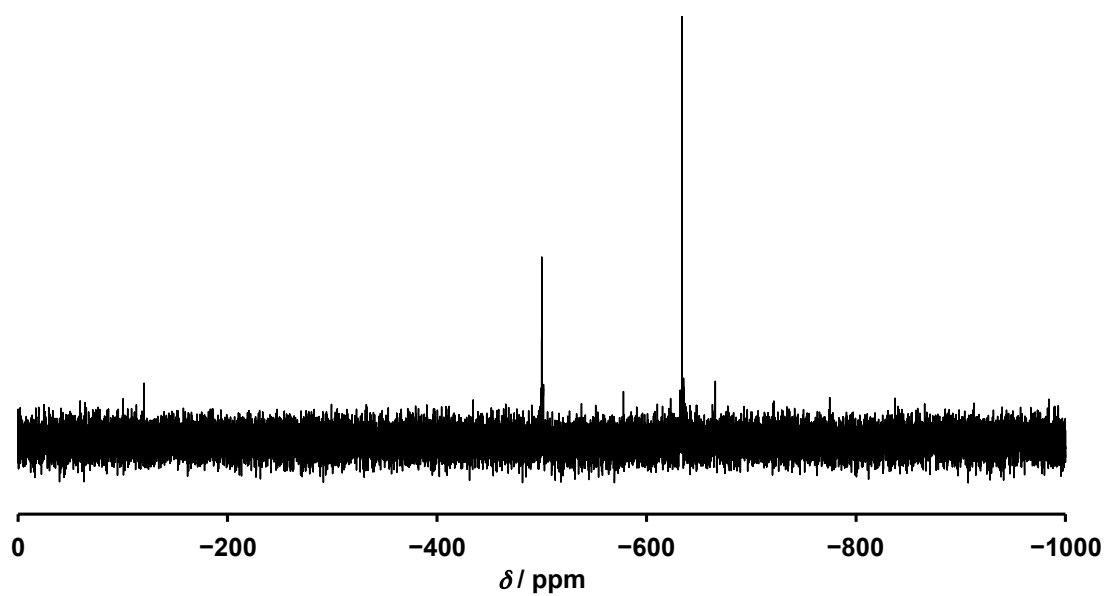

**Fig. S11**  $^{119}\text{Sn}$  NMR spectra of a) **II** and b) **II** + TBAOH (1 equiv with respect to **II**) in acetonitrile- $d_3$ .

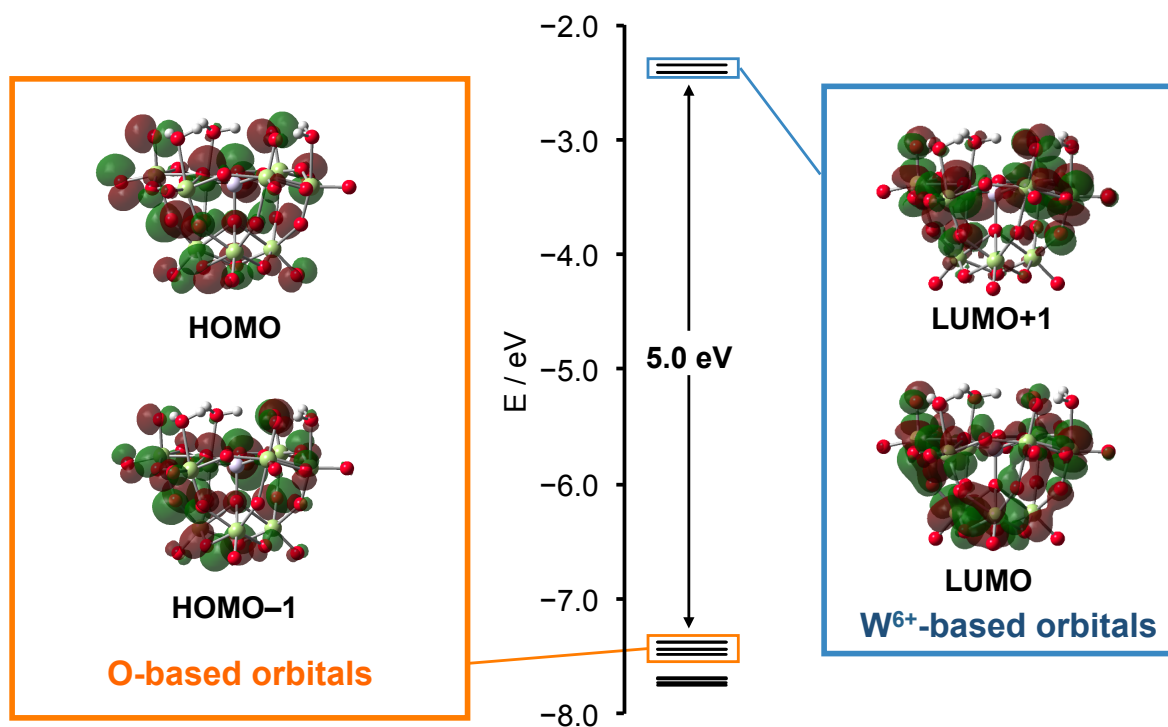

**Fig. S12** Energy diagram and molecular orbitals of **SiW9**. Gray, light green, and red spheres represent Si, W, and O atoms, respectively,

a)

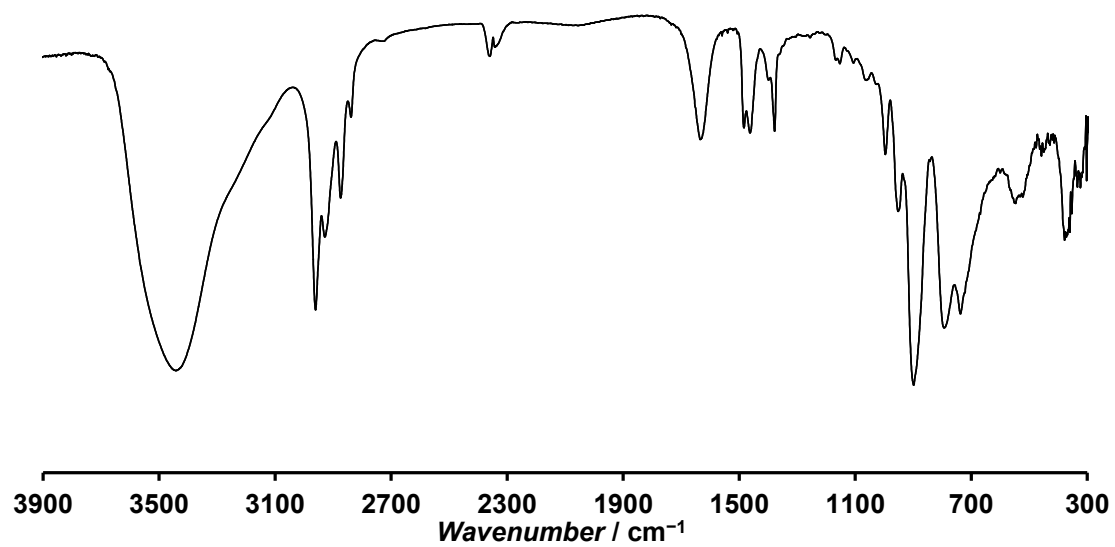

b)

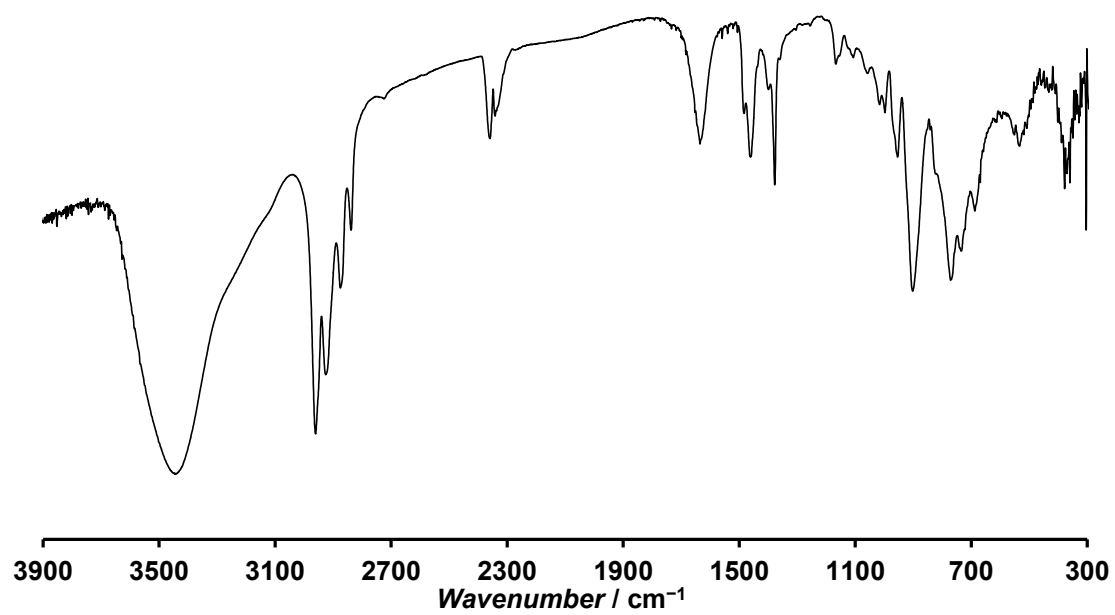

**Fig. S13** IR spectra of a) **I** and b) **II**.

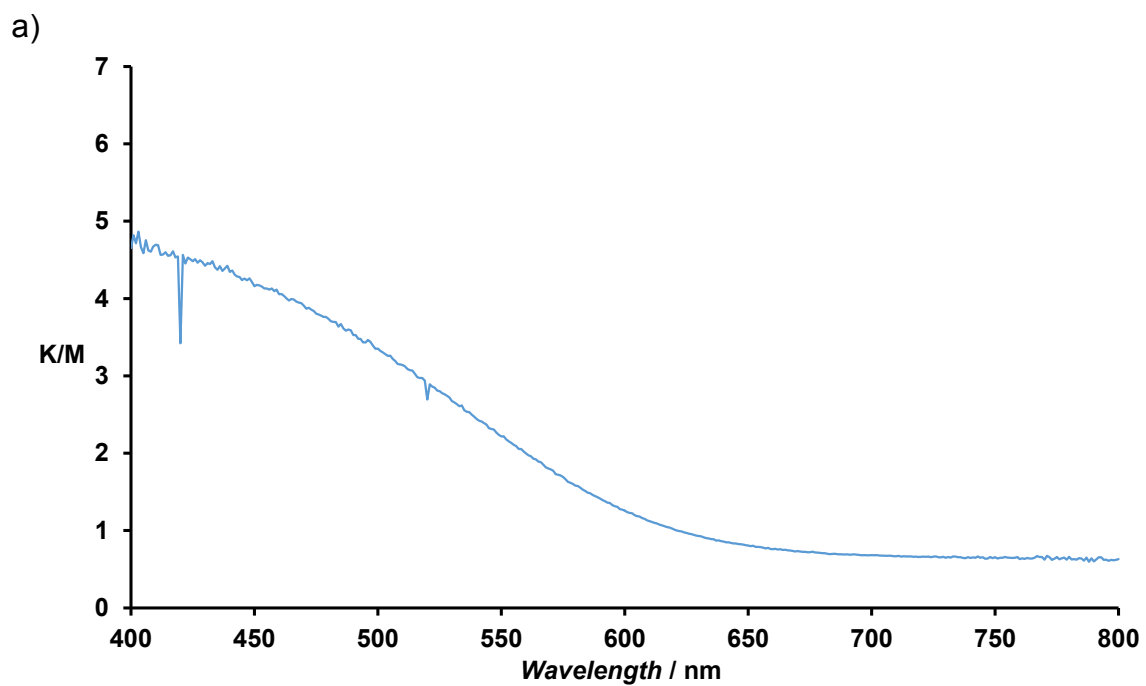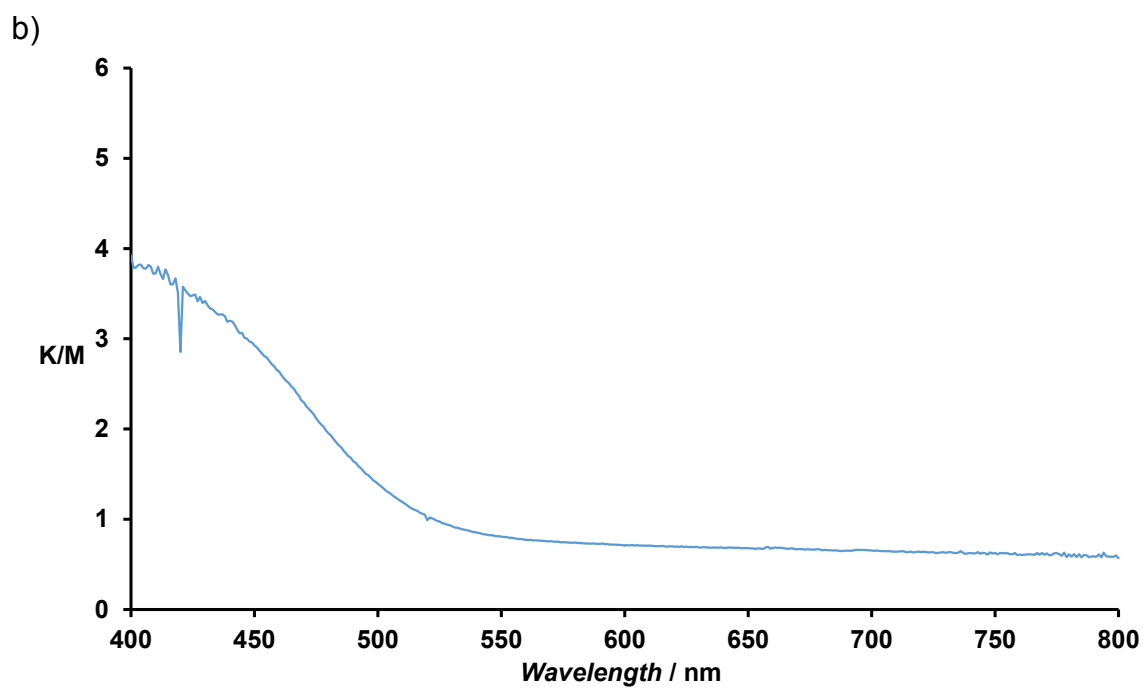

Fig. S14 UV/Vis diffuse reflectance spectra of a) **I** and b) **II**.

a)

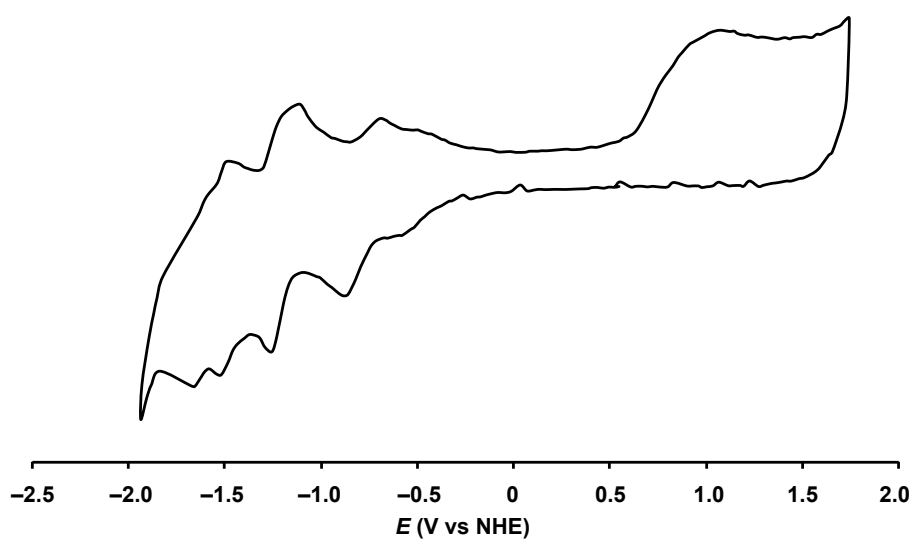

b)

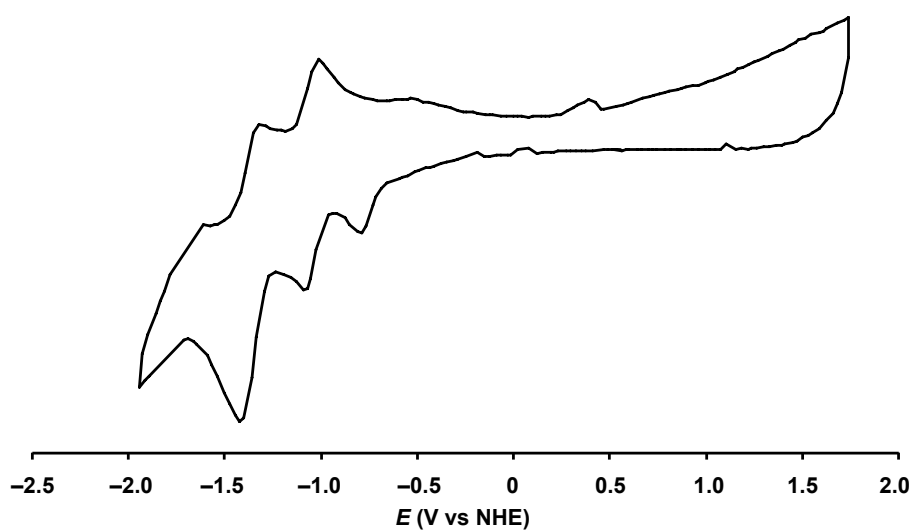

**Fig. S15** Cyclic voltammogram of a) **I** and b) **II** (0.5 mM) in acetonitrile.
